# Supplementary material for: Mutation-specific reporter for optimization and enrichment of prime editing
Source: PubMed Central journal article supplement (PMC8888566; doi:10.1038/s41467-022-28656-3), 2022-03-01
Supplement: 41467_2022_28656_MOESM3_ESM.pdf [file 41467_2022_28656_MOESM3_ESM.pdf]

**Title:** Supplementary Data file 1:

**Description:** Differentially expressed genes in fluoPEER-edited vs. -unedited cells (included as a separate excel file)

**Title:** Supplementary Data file 2:

**Description:** Oligos used in this study (included as a separate excel file)
